# Supplementary material for: Infrared Multiple Photon Dissociation of Cesium Iodide Clusters Doped with Mono-, Di- and Triglycine
Source: PubMed Central journal article supplement — Eur J Mass Spectrom (Chichester). Author manuscript; Available in PMC 2020 Mar 27. (PMC7100558; doi:10.1177/1469066718803307), 2018-10-04
Supplement: EMS85922-supplement-Supporting_Information.pdf [file EMS85922-supplement-Supporting_Information.pdf]

**Supporting Information for the manuscript:**

**Infrared Multiple Photon Dissociation of Cesium Iodide Clusters Doped with Mono-, Di- and Triglycine**

*Jakob Heller, Milan Ončák, Nina K. Bersenkovitsch, Christian van der Linde, and Martin K. Beyer*

*Institut für Ionenphysik und Angewandte Physik, Leopold-Franzens-Universität Innsbruck,*

*Technikerstraße 25, 6020 Innsbruck, Austria*

*E-mail: martin.beyer@uibk.ac.at*

## Lookup table for the evaluation of multiphoton cross sections

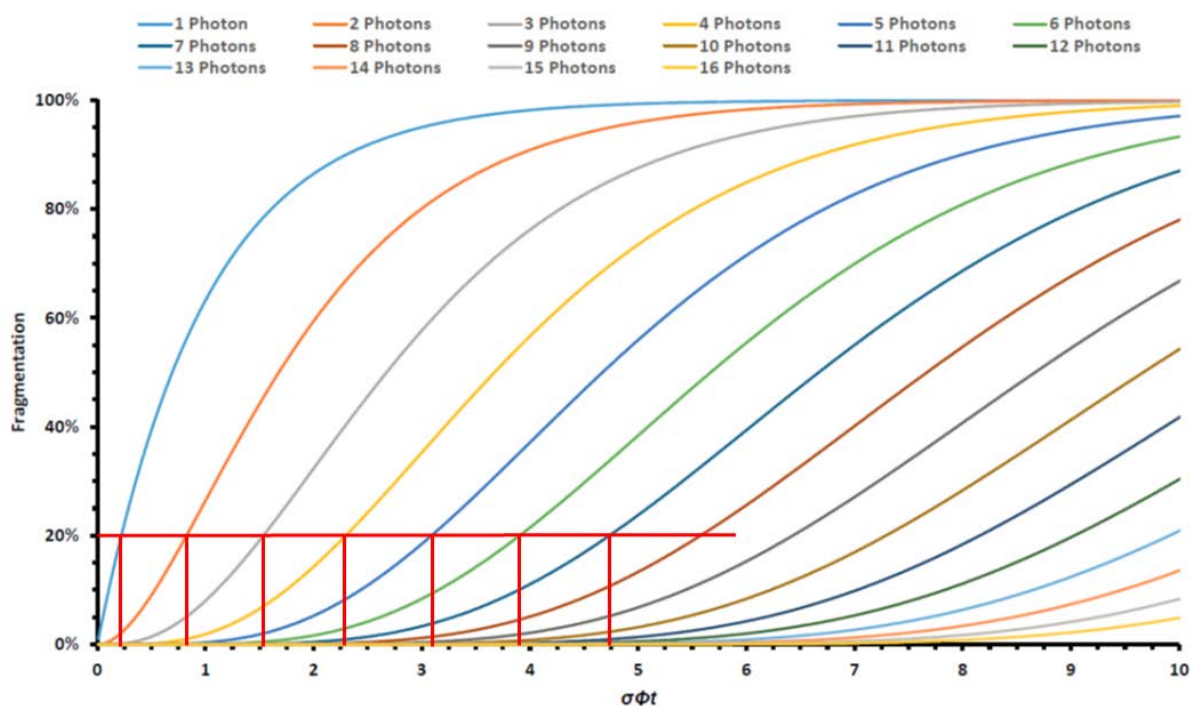

**Figure S1:** Graphical representation of the lookup table used for the quantitative analysis of multiphoton absorption.

Quantitative data analysis is based on the consecutive first-order reactions shown in Figure S1. Assuming that the absorption cross section does not change during the absorption of multiple photons, Figure S1 shows the kinetics of IR photon absorption. If fragmentation occurs upon absorption of the  $k^{\text{th}}$  photon, the value of  $\sigma\Phi t$  is obtained readily from the graph, as shown for 20% fragmentation yield for 1 to 7 photons. Photon flux  $\Phi$  is measured with a power meter,  $t$  is set in the control software, thus  $\sigma$  can be calculated from  $\sigma\Phi t$ . This graphical scheme is implemented in our data analysis software with a densely spaced lookup table.

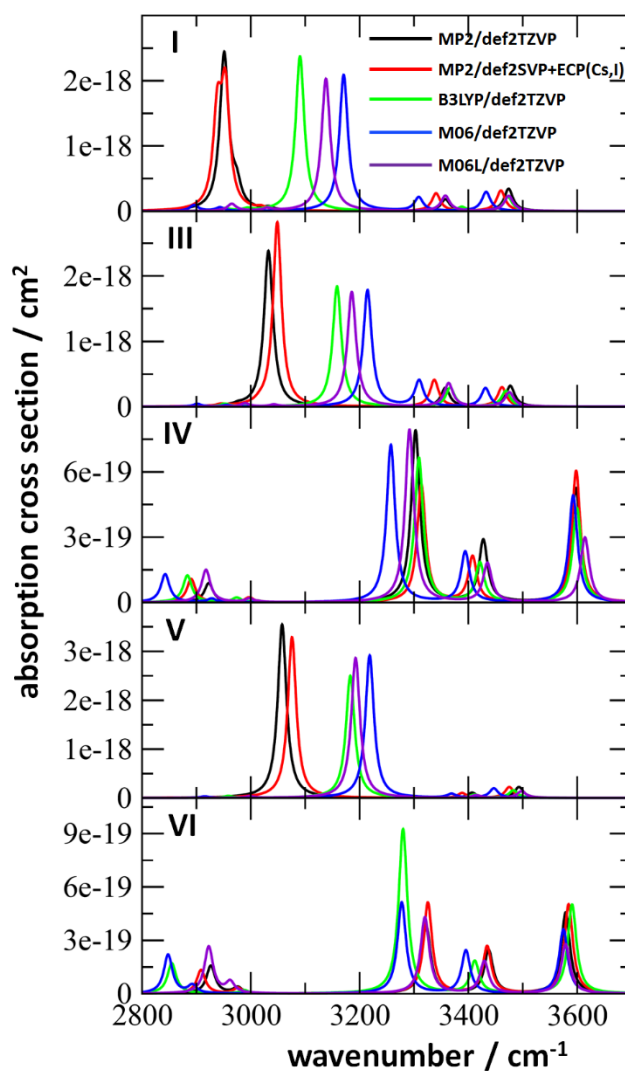

**Figure S2:** Vibrational spectra of five  $\text{Cs}_3\text{I}_2\text{.G}^+$  isomers calculated at various levels of theory (see Figure 1 for structures). The “def2SVP+ECP(Cs,I)” basis set stands for ECP54SDF on Cs, ECP46MDF on I, and def2SVP on all other atoms. The following factors were used to scale the calculated peak positions: 0.963 (MP2/def2TZVP), 0.942 (MP2/def2SVP+ECP(Cs,I)), 0.966 (B3LYP/def2TZVP), 0.951 (M06/def2TZVP), 0.966 (M06L/def2TZVP).

**Table S1:** Relative energy of four  $\text{Cs}_3\text{I}_2\text{.G}^+$  isomers at various levels of theory, the def2TZVP basis set was used unless stated otherwise. The “def2SVP+ECP(Cs,I)” basis set stands for ECP54SDF on Cs, ECP46MDF on I, and def2SVP on all other atoms. See Figure 1 for the respective structures.

| isomer | MP2  | MP2/def2SVP+ECP(Cs,I) | B3LYP | M06  | M06L |
|--------|------|-----------------------|-------|------|------|
| I      | 0.0  | 0.0                   | 0.0   | 0.0  | 0.0  |
| III    | 45.7 | 24.1                  | 27.1  | 48.2 | 47.4 |
| IV     | 26.5 | 25.9                  | 13.6  | 21.7 | 23.5 |
| V      | 58.6 | 27.4                  | 19.2  | 55.0 | 56.4 |
| VI     | 41.1 | 38.2                  | 28.6  | 37.2 | 38.1 |

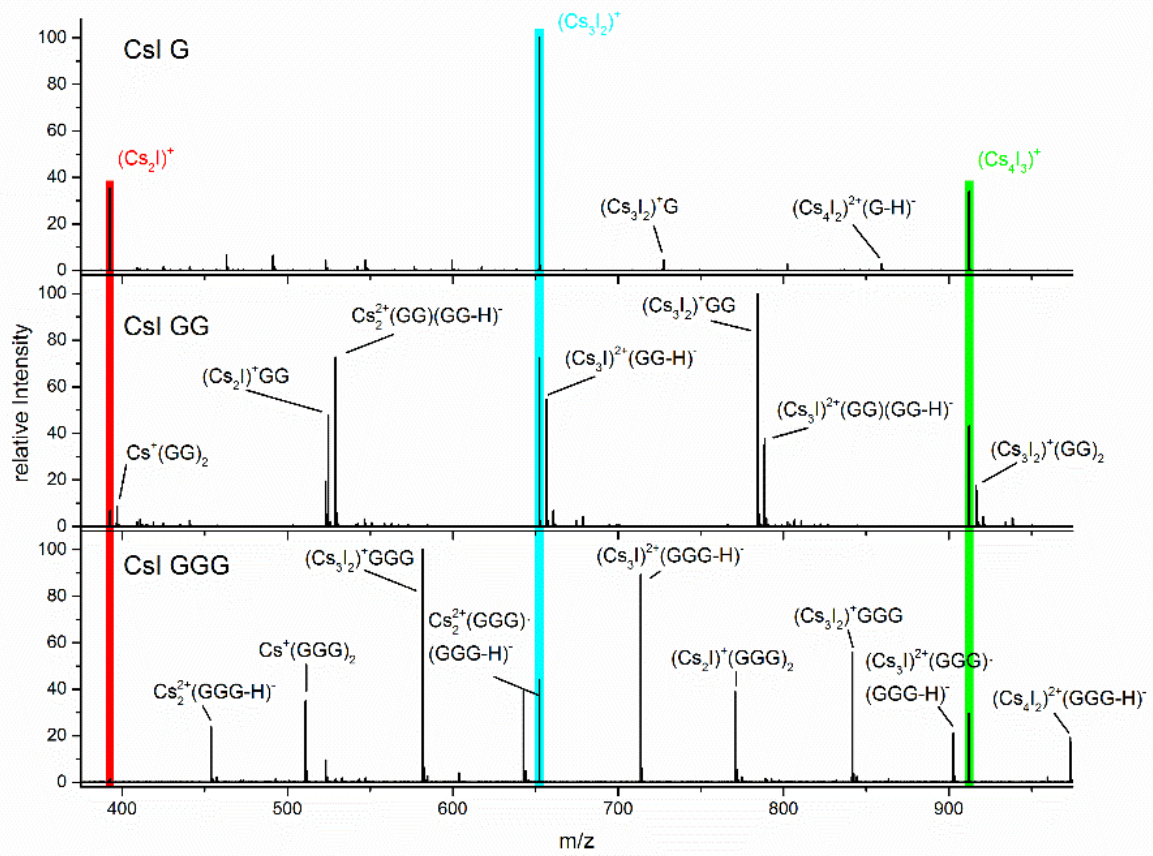

**Figure S3:** Mass spectra of CsI mixed with glycine (G) (top), diglycine GG (middle) and triglycine GGG (bottom). Complexes consisting of neutral and deprotonated peptides are found.

**Table S2:** Identified complexes in ESI of CSI with G.

| Ion                                       | $m_{\text{meas}}$ (Da) | $m_{\text{exact}}$ (Da) | $\Delta m$ (ppm) | $\Delta m$ (Da) |
|-------------------------------------------|------------------------|-------------------------|------------------|-----------------|
| $\text{Cs}_2^{2+}(\text{G-H})^-$          | 339.8318               | 339.8351                | -9.7107          | -3.3000         |
| $(\text{Cs}_2\text{I})^+$                 | 392.7120               | 392.7154                | -8.5982          | -3.3766         |
| $(\text{Cs}_3\text{I}_2)^+$               | 652.5204               | 652.5253                | -7.5394          | -4.9196         |
| $(\text{Cs}_3\text{I}_2)^+\text{G}$       | 727.5537               | 727.5573                | -5.0033          | -3.6402         |
| $(\text{Cs}_4\text{I}_2)^+(\text{G-H})^-$ | 859.4524               | 859.4550                | -2.9646          | -2.5479         |
| $(\text{Cs}_4\text{I}_3)^+$               | 912.3252               | 912.3352                | -10.9533         | -9.9929         |
| $(\text{Cs}_5\text{I}_3)^+(\text{G-H})^-$ | 1119.2674              | 1119.2649               | 2.2191           | 2.4837          |
| $(\text{Cs}_5\text{I}_4)^+$               | 1172.1370              | 1172.1452               | -6.9744          | -8.1749         |

**Table S3:** Identified complexes in ESI of CSI with GG.

| Ion                                                    | $m_{\text{meas}}$ (Da) | $m_{\text{exact}}$ (Da) | $\Delta m$ (ppm) | $\Delta m$ (Da) |
|--------------------------------------------------------|------------------------|-------------------------|------------------|-----------------|
| $\text{Cs}^+\text{GG}$                                 | 264.9559               | 264.9589                | -11.3226         | -3.0000         |
| $(\text{Cs}_2\text{I})^+$                              | 392.7127               | 392.7154                | -6.9287          | -2.7210         |
| $\text{Cs}_2^{2+}(\text{GG-H})^-$                      | 396.8537               | 396.8566                | -7.1512          | -2.8380         |
| $\text{Cs}^+(\text{GG})_2$                             | 397.0097               | 397.0124                | -6.8966          | -2.7380         |
| $(\text{Cs}_2\text{I})^+\text{GG}$                     | 524.7662               | 524.7689                | -5.0213          | -2.6350         |
| $\text{Cs}_2^{2+}(\text{GG})(\text{GG-H})^-$           | 528.9072               | 528.9101                | -5.5000          | -2.9090         |
| $(\text{Cs}_3\text{I}_2)^+$                            | 652.5228               | 652.5253                | -3.7853          | -2.4700         |
| $(\text{Cs}_3\text{I})^{2+}(\text{GG-H})^-$            | 656.6639               | 656.6665                | -3.9609          | -2.6010         |
| $(\text{Cs}_2\text{I})^+(\text{GG})_2$                 | 656.8202               | 656.8224                | -3.3434          | -2.1960         |
| $(\text{Cs}_3\text{I}_2)^+\text{GG}$                   | 784.5755               | 784.5788                | -4.2086          | -3.3020         |
| $(\text{Cs}_3\text{I})^{2+}(\text{GG})(\text{GG-H})^-$ | 788.7183               | 788.7200                | -2.0920          | -1.6500         |
| $(\text{Cs}_4\text{I}_3)^+$                            | 912.3338               | 912.3352                | -1.5597          | -1.4230         |
| $(\text{Cs}_4\text{I}_2)^{2+}(\text{GG-H})^-$          | 916.4777               | 916.4764                | 1.4054           | 1.2880          |
| $(\text{Cs}_3\text{I}_2)^+(\text{GG})_2$               | 916.6303               | 916.6323                | -2.1208          | -1.9440         |

**Table S4:** Identified complexes in ESI of CsI with GGG.

| Ion                                                        | $m_{\text{meas}}$ (Da) | $m_{\text{exact}}$ (Da) | $\Delta m$ (ppm) | $\Delta m$ (Da) |
|------------------------------------------------------------|------------------------|-------------------------|------------------|-----------------|
| Cs <sup>+</sup> GGG                                        | 321.9801               | 321.9804                | -0.9121          | -0.2937         |
| (Cs <sub>2</sub> ) <sup>+</sup>                            | 392.7144               | 392.7154                | -2.4947          | -0.9797         |
| Cs <sub>2</sub> <sup>2+</sup> (GGG-H) <sup>-</sup>         | 453.8767               | 453.8780                | -2.9884          | -1.3564         |
| Cs <sup>+</sup> (GGG) <sub>2</sub>                         | 511.0538               | 511.0554                | -2.9648          | -1.5152         |
| (Cs <sub>2</sub> ) <sup>+</sup> GGG                        | 581.7881               | 581.7903                | -3.7647          | -2.1902         |
| Cs <sub>2</sub> <sup>2+</sup> (GGG)(GGG-H) <sup>-</sup>    | 642.9503               | 642.9530                | -4.2337          | -2.7220         |
| (Cs <sub>3</sub> ) <sup>+</sup>                            | 652.5224               | 652.5253                | -4.3711          | -2.8522         |
| (Cs <sub>3</sub> ) <sup>2+</sup> (GGG-H) <sup>-</sup>      | 713.6848               | 713.6880                | -4.3885          | -3.1320         |
| (Cs <sub>2</sub> ) <sup>+</sup> (GGG) <sub>2</sub>         | 770.8626               | 770.8653                | -3.4988          | -2.6971         |
| (Cs <sub>3</sub> ) <sup>+</sup> GGG                        | 841.5980               | 841.6003                | -2.7026          | -2.2745         |
| (Cs <sub>3</sub> ) <sup>2+</sup> (GGG)(GGG-H) <sup>-</sup> | 902.7605               | 902.7629                | -2.7225          | -2.4578         |
| (Cs <sub>4</sub> ) <sup>+</sup>                            | 912.3313               | 912.3352                | -4.3088          | -3.9311         |
| (Cs <sub>4</sub> ) <sup>+</sup> (GGG-H) <sup>-</sup>       | 973.4934               | 973.4979                | -4.6082          | -4.4860         |
| (Cs <sub>3</sub> ) <sup>+</sup> (GGG) <sub>2</sub>         | 1030.6706              | 1030.6752               | -4.4420          | -4.5782         |
| (Cs <sub>4</sub> ) <sup>+</sup> GGG                        | 1101.4076              | 1101.4102               | -2.3809          | -2.6224         |
| (Cs <sub>5</sub> ) <sup>+</sup>                            | 1172.1350              | 1172.1452               | -8.6287          | -10.1140        |
| (Cs <sub>5</sub> ) <sup>2+</sup> (GGG-H) <sup>-</sup>      | 1233.3025              | 1233.3078               | -4.3312          | -5.3416         |

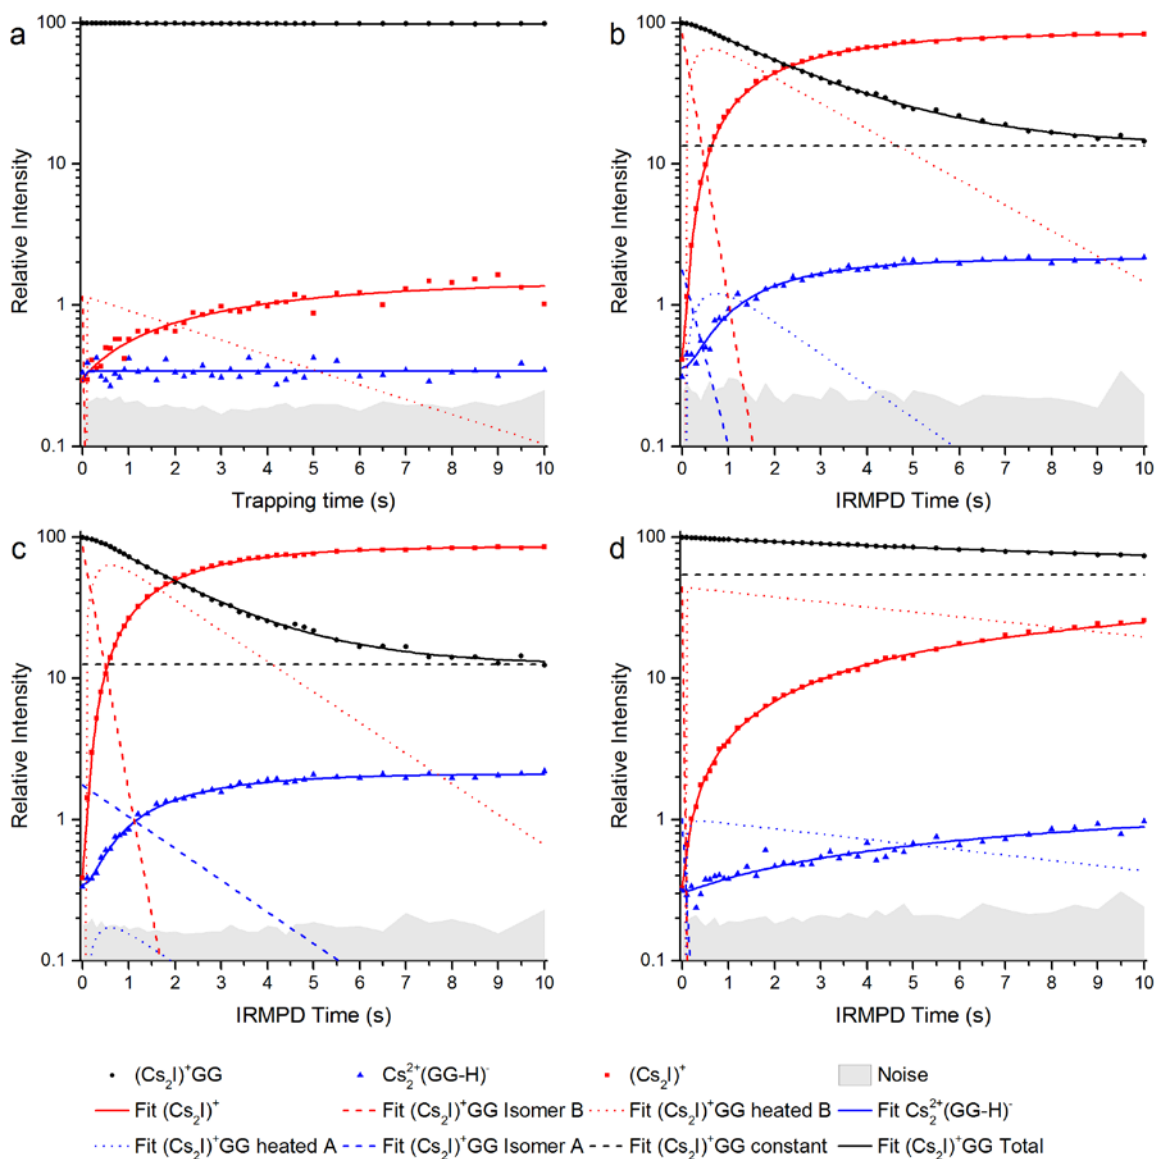

**Figure S4:** Kinetics of  $(\text{Cs}_2\text{I})^+\text{GG}$  at (a) without laser irradiation, i.e. fragment formation exclusively due to BIRD, (b)  $2941\text{ cm}^{-1}$ , (c)  $3390\text{ cm}^{-1}$  and (d)  $3571\text{ cm}^{-1}$ . Solid lines are fits to the experimental data, the dashed lines represent the cold fraction of the respective isomer, the dotted lines the hot fraction.

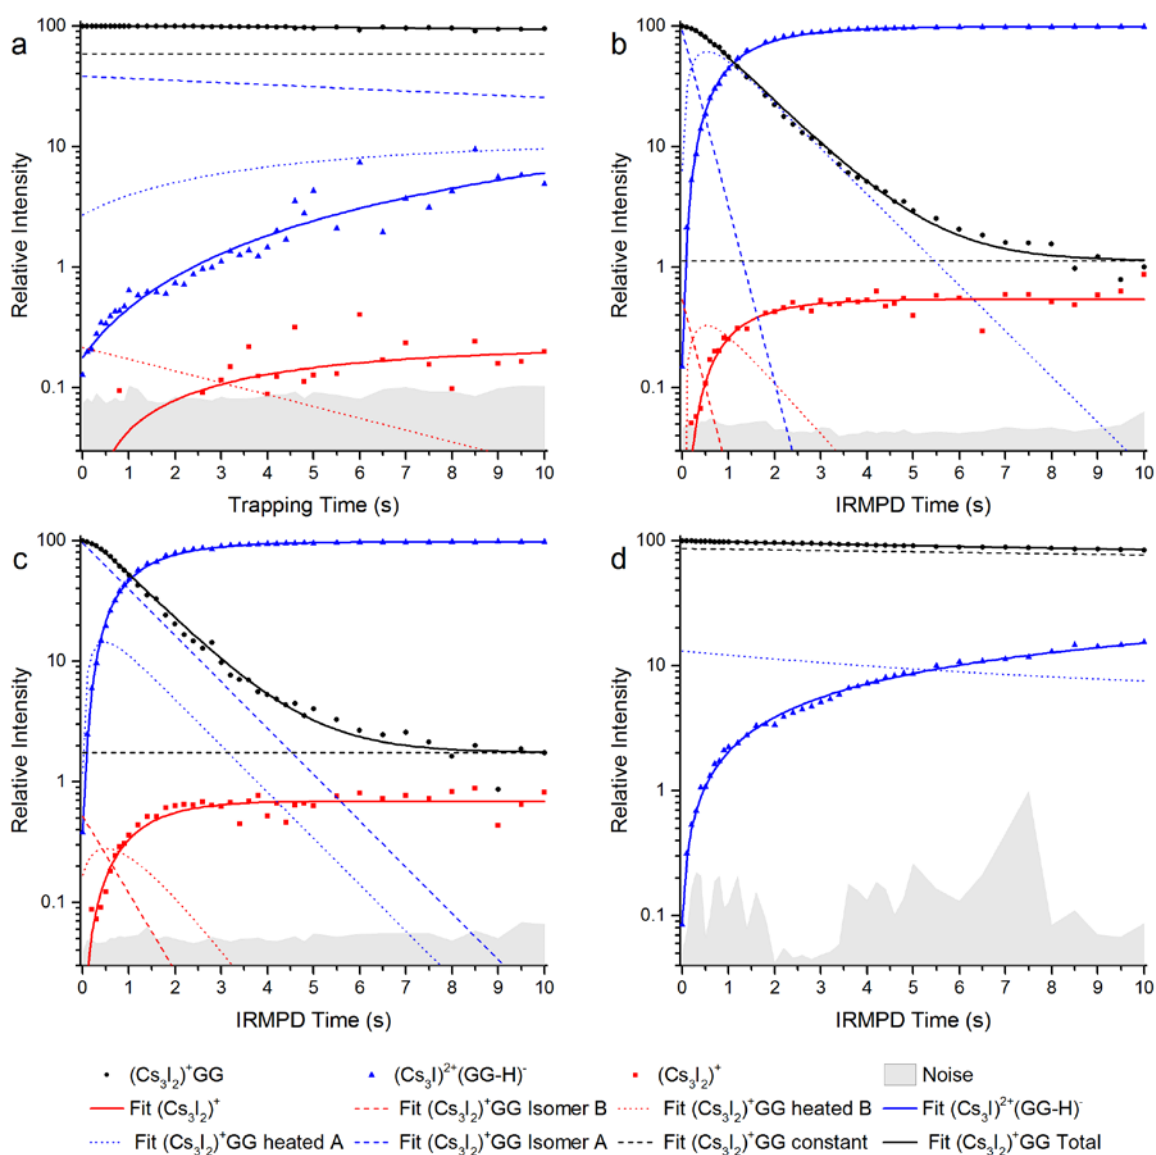

**Figure S5:** Kinetics of  $(\text{Cs}_3\text{I}_2)^+\text{GG}$  at (a) without laser irradiation, i.e. fragment formation exclusively due to BIRD, (b)  $2941\text{ cm}^{-1}$ , (c)  $3390\text{ cm}^{-1}$  and (d)  $3571\text{ cm}^{-1}$ . Solid lines are fits to the experimental data, the dashed lines represent the cold fraction of the respective isomer, the dotted lines the hot fraction.



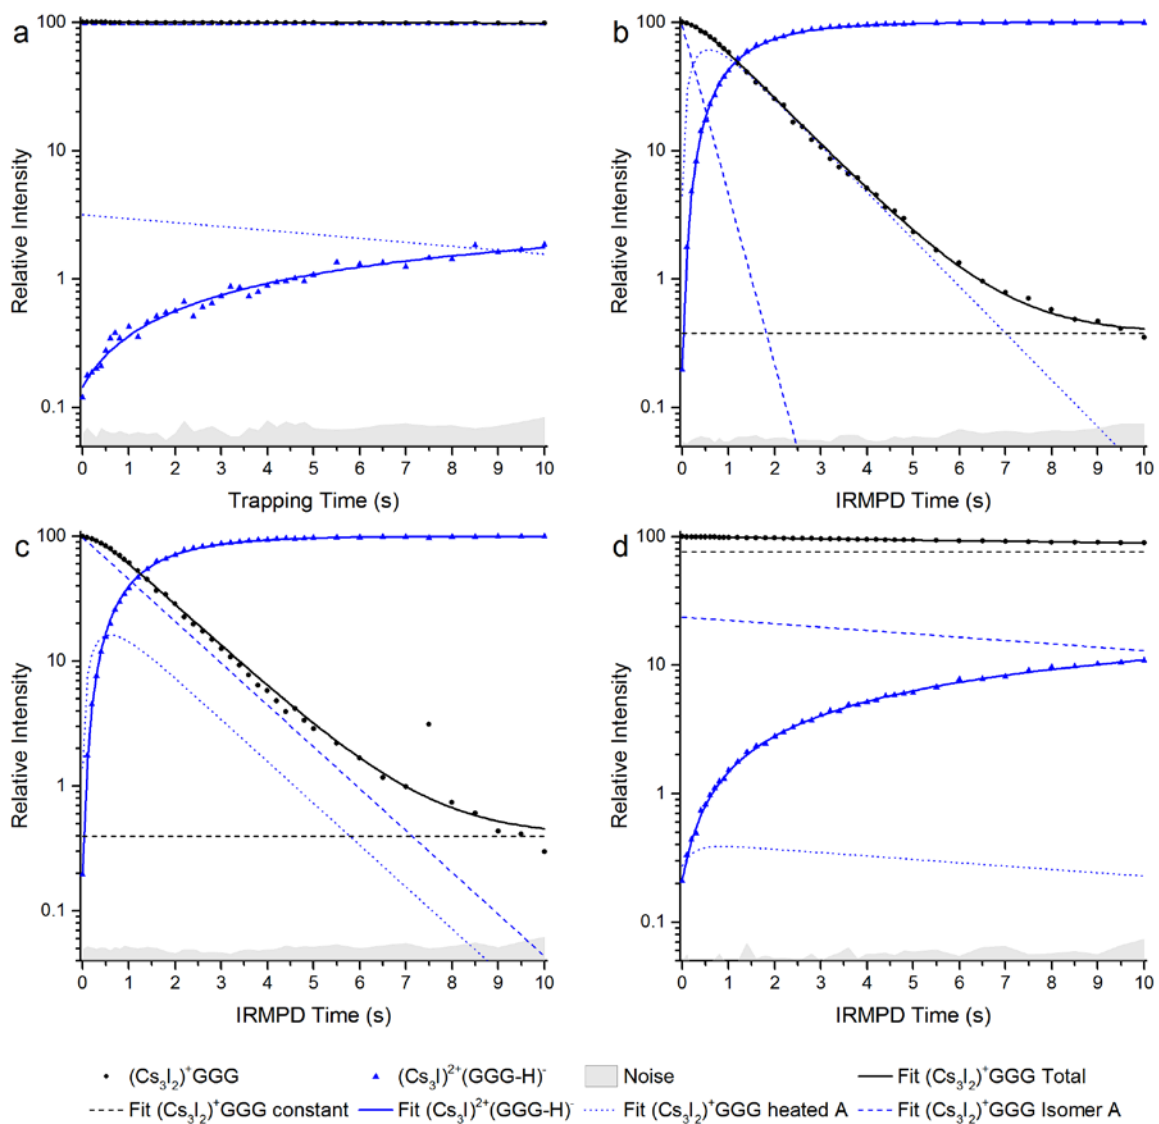

**Figure S6:** Kinetics of  $(\text{Cs}_3\text{I}_2)^+\text{GGG}$  at (a) without radiation, (b)  $2941\text{ cm}^{-1}$ , (c)  $3390\text{ cm}^{-1}$  and (d)  $3571\text{ cm}^{-1}$ . Solid lines are fits to the experimental data, the dashed lines represent the cold fraction of the ion population, the dotted lines the hot fraction.

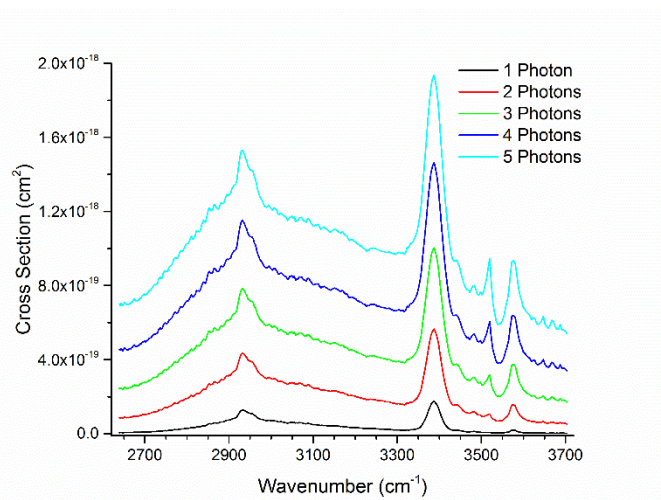

**Figure S7:** Absorption cross section of  $(\text{Cs}_2\text{I})^+\text{GG}$  derived for IRMPD with 1-5 photons.

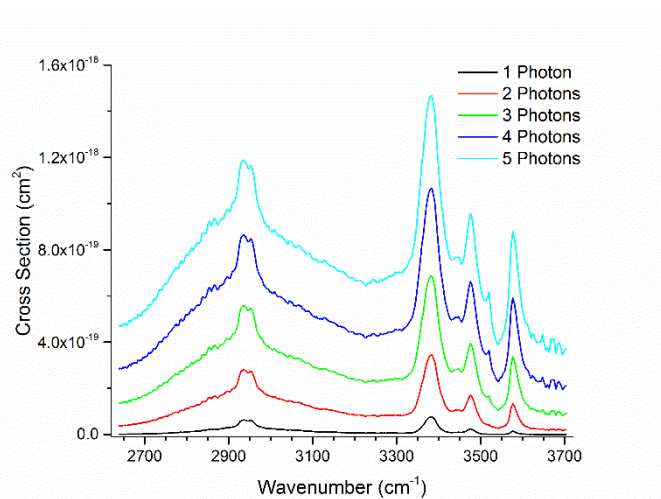

**Figure S8:** Absorption cross section of  $(\text{Cs}_2\text{I})^+\text{GGG}$  derived for IRMPD with 1-5 photons.

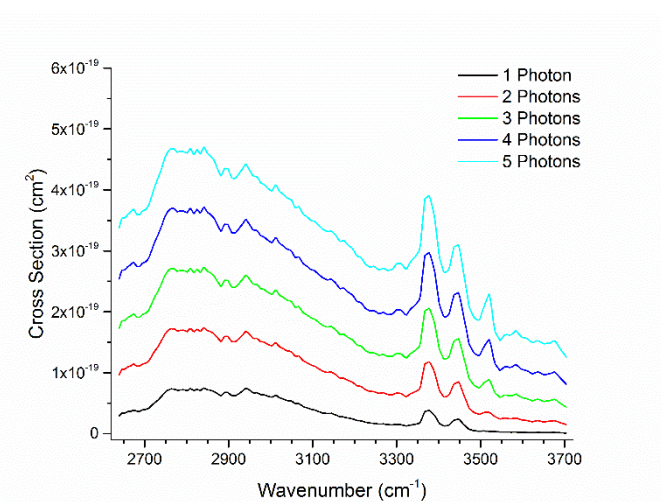

**Figure S9:** Absorption cross section of  $(\text{Cs}_3\text{I}_2)^+\text{G}$  derived for IRMPD with 1-5 photons.

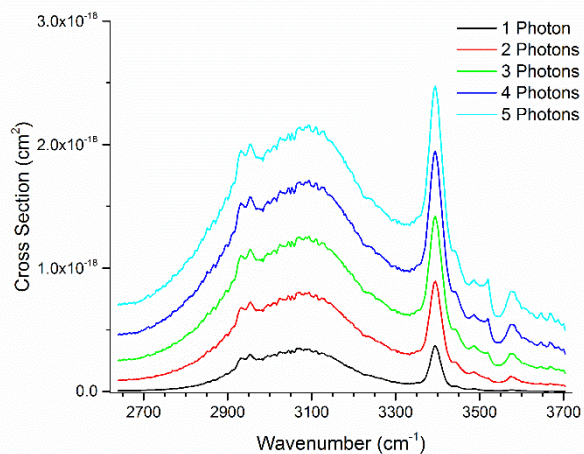

**Figure S10:** Absorption cross section of (Cs<sub>3</sub>I<sub>2</sub>)<sup>+</sup>GG derived for IRMPD with 1-5 photons.

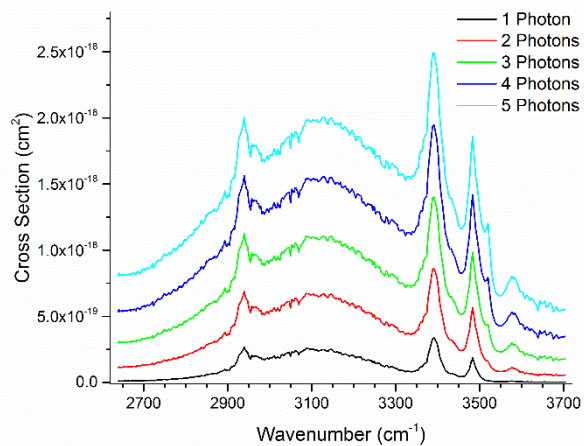

**Figure S11:** Absorption cross section of (Cs<sub>3</sub>I<sub>2</sub>)<sup>+</sup>GGG derived for IRMPD with 1-5 photons.

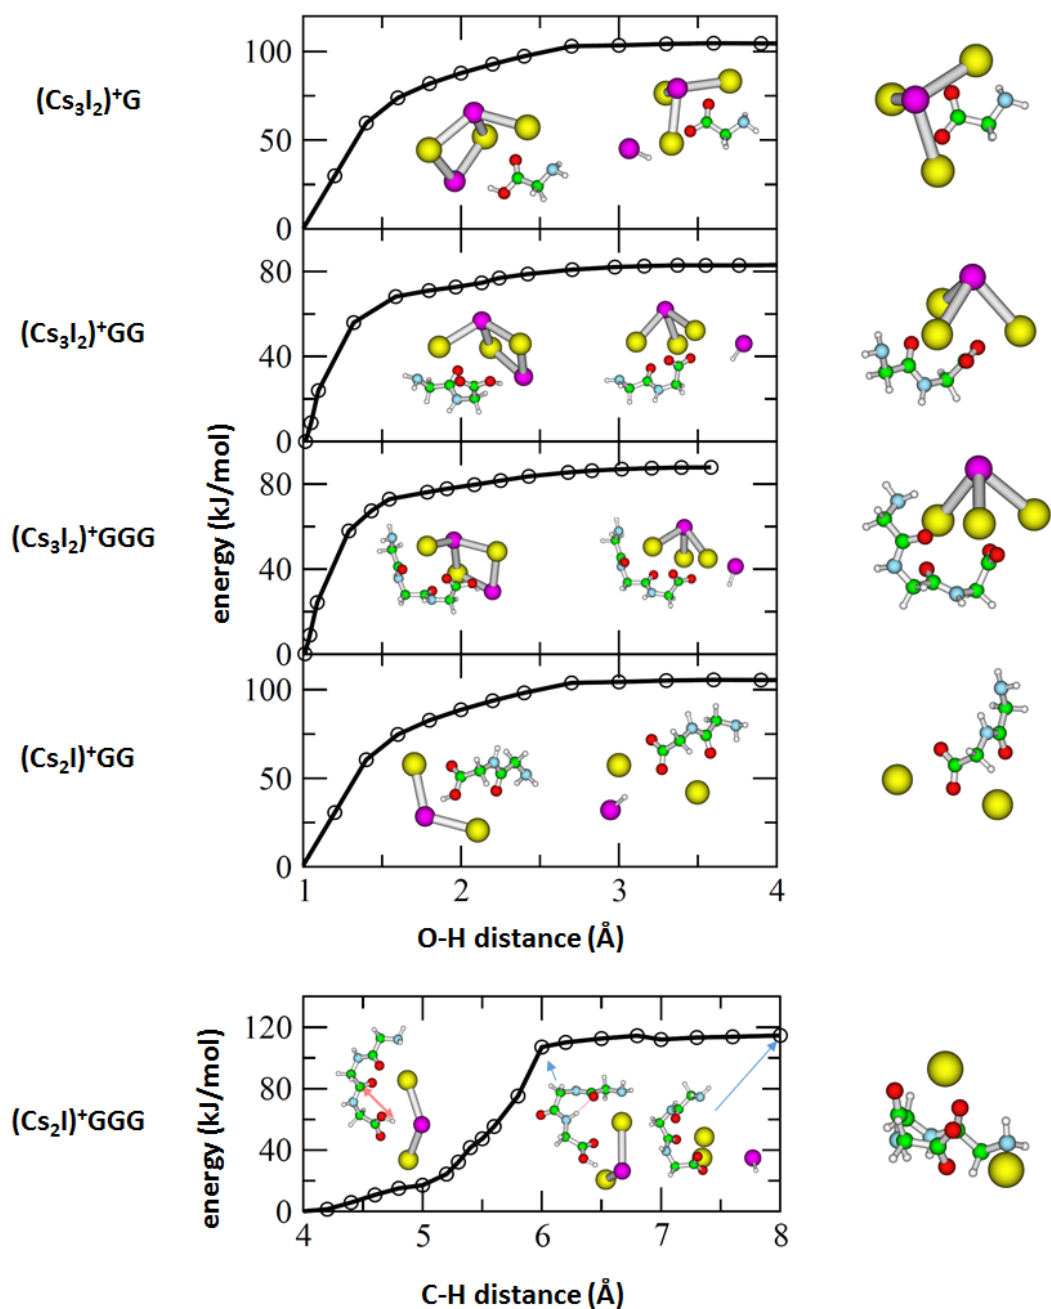

**Figure S12:** Relaxed scans of HI formation and dissociation from isomers I of the respective ions (isomer II for  $(\text{Cs}_2\text{I})^+\text{GGG}$ ), calculated at the B3LYP/def2TZVP level of theory. The O-H coordinate is used with the exception of  $(\text{Cs}_2\text{I})^+\text{GGG}$  where a C-H coordinate (red arrow) is used to avoid proton transfer between oxygen atoms. For  $\text{Cs}_2\text{I}^+\text{GG}$ , direct dissociation was possible from the initial structure. For other isomers, reorganization either of the initial structure or during the dissociation process was observed, increasing the dissociation barrier. For  $(\text{Cs}_2\text{I})^+\text{GGG}$ , the break in the curve is induced by geometry relaxation, indicating a possible further small barrier (see structures). On the right hand side, the most stable calculated structures after HI elimination are shown, which correspond to the product channels of Table 1.

**Cartesian coordinates of optimized clusters (in Ångstrom) along with the zero-point corrected energy calculated at the MP2/def2SVP+ECP(Cs,I) level of theory (in Hartree)**

Cs3I2+.G, iso I  
E=-306.349507  
I 1.810526 -2.091729 -0.168601  
Cs -1.224023 -1.036742 -2.415344  
I -0.379859 2.183697 0.205633  
Cs 3.486516 1.452694 -0.122881  
Cs -0.895823 -1.205241 2.531080  
N -4.186145 2.636501 -0.196357  
C -4.126993 1.535376 0.750232  
C -3.583554 0.315645 0.017330  
H -3.503193 1.716658 1.635019  
H -5.139096 1.275323 1.093132  
O -3.133658 -0.678524 0.553837  
O -3.681283 0.446687 -1.300315  
H -3.309000 3.160246 -0.174800  
H -4.006549 1.398310 -1.382250  
H -4.948494 3.279152 0.000128

Cs3I2+.G, iso II  
E=-306.342093  
C 2.641107 2.335325 -2.385494  
H -0.521689 1.877942 -1.907136  
N 3.789497 2.108513 -1.510932  
C 1.348501 2.196611 -1.608666  
O 1.296245 2.362110 -0.399867  
O 0.337927 1.923143 -2.401624  
Cs -2.841544 -2.379781 -0.599261  
I 0.644694 -1.751915 1.164475  
Cs -0.477224 2.020813 2.041504  
Cs 4.036158 -0.963038 -0.423555  
I -2.832900 1.458528 -0.946745  
H 4.616158 2.498379 -1.962203  
H 3.644027 2.691481 -0.685324  
H 2.629719 1.618520 -3.216384  
H 2.612809 3.340294 -2.843068

Cs3I2+.G, iso III  
E=-306.340319  
C 5.786550 -1.777041 0.809177  
N 6.262359 -1.108978 -0.392112  
C 4.496829 -2.512363 0.472477  
O 3.717763 -2.954914 1.290824  
O 4.298118 -2.622064 -0.840300  
Cs -5.935764 -0.933031 0.049839  
I -2.271703 0.072229 -0.044588  
Cs 1.195922 -2.093136 -0.174105  
I 3.285300 1.245121 -0.093657  
Cs 0.127041 3.303616 0.088824  
H 7.275662 -1.046175 -0.422811  
H 5.070100 -2.102887 -1.213593  
H 5.582216 -1.117269 1.663573  
H 6.510581 -2.535747 1.138523  
H 5.881040 -0.162112 -0.438652

Cs3I2+.G, iso IV  
E=-306.339629  
I -1.386461 0.542671 2.249722  
Cs -3.828058 -0.211781 -0.744517  
I -0.195618 -0.495418 -2.250652  
Cs 1.128732 -2.291972 1.203531  
Cs 1.044111 2.605141 -0.065576  
C 4.595899 -0.996248 -1.113777  
C 4.557520 0.268596 -0.295683  
O 5.787569 0.707169 -0.030042  
O 3.547182 0.851250 0.052653  
H 5.711619 1.543005 0.458198  
N 3.319189 -1.687181 -1.098023  
H 2.611818 -1.099768 -1.548050  
H 3.395523 -2.490493 -1.721285  
H 4.947963 -0.689272 -2.116440  
H 5.387238 -1.635388 -0.700191

Cs3I2+.G, iso V  
E=-306.339054  
C 9.230845 0.203182 0.051025  
N 9.744637 -1.160091 0.110391  
C 7.705551 0.168970 0.022121  
O 7.003667 1.156819 -0.028614  
O 7.211370 -1.065174 0.058775  
Cs 4.120374 0.283329 -0.044544  
I 0.289423 0.061861 -0.016420  
Cs -2.776207 2.704528 0.012222  
I -5.255492 -0.128757 0.021279  
Cs -2.582604 -2.779213 -0.006495  
H 10.303123 -1.323711 0.944131  
H 8.037896 -1.628543 0.095837  
H 9.563253 0.749014 -0.842263  
H 9.528255 0.811741 0.915658  
H 10.332019 -1.383852 -0.688818

Cs3I2+.G, iso VI  
E=-306.334964  
C -0.738321 -2.047266 1.890812  
C -1.937802 -2.291620 1.006590  
O -1.700566 -3.088456 -0.047627  
N 0.372327 -2.949596 1.675218  
O -3.027309 -1.787157 1.197998  
Cs -4.501336 0.721533 0.565590  
I -1.082214 0.968133 -1.243419  
Cs 2.158685 2.992673 -0.070960  
I 3.210133 -0.398340 1.273749  
Cs 1.271825 -2.478589 -1.370919  
H 1.223634 -2.499986 2.017937  
H 0.250158 -3.799773 2.220782  
H -0.413897 -1.024647 1.641097  
H -1.126933 -2.001456 2.922161  
H -2.543807 -3.146660 -0.527526

Cs3I2+.GG, iso I  
E=-513.579328

C -4.802684 -1.664197 0.350349  
N -5.333169 -0.328100 0.451022  
C -3.365922 -1.753841 0.842755  
O -2.554304 -2.518321 0.358846  
O -3.139100 -0.938886 1.859917  
Cs 0.176807 -2.988585 -0.667898  
I 2.080586 0.129292 -2.181514  
Cs 3.956082 0.879902 1.163983  
I 0.280506 -0.039176 2.205500  
Cs -1.199308 2.091424 -1.072076  
C -4.644263 0.677811 -0.131924  
H -6.050358 -0.120788 1.132833  
H -4.809826 -2.018328 -0.687611  
H -5.422398 -2.343181 0.950366  
H -2.179677 -0.935426 2.085364  
C -5.156700 2.085379 0.118185  
O -3.655235 0.453661 -0.828027  
N -4.049149 2.953601 0.508519  
H -5.570384 2.444342 -0.835293  
H -5.990902 2.064104 0.840387  
H -4.381811 3.916510 0.528102  
H -3.796748 2.744829 1.475233

Cs3I2+.GG, iso II  
E=-513.574443

C 1.011718 0.306597 2.364387  
N 1.767742 1.488518 2.765224  
C 1.946048 -0.809616 1.927216  
N 1.400394 -2.044421 1.929806  
O 3.119427 -0.615609 1.600161  
I -2.289470 -1.858089 1.210856  
Cs -0.420031 -1.867222 -2.210255  
I -0.117570 2.001501 -1.376559  
Cs 3.531038 2.031217 0.165774  
Cs -3.596153 1.733801 0.532945  
H 1.106887 2.203210 3.064989  
H 2.309168 1.262537 3.599344  
H 0.381002 0.559538 1.499121  
H 0.336348 -0.091069 3.139116  
C 2.221510 -3.168363 1.592100  
H 0.390806 -2.153177 2.035486  
C 2.663474 -3.184598 0.143665  
H 3.124497 -3.195234 2.215448  
H 1.661740 -4.095397 1.778170  
O 3.769548 -3.913005 -0.005272  
O 2.078101 -2.658624 -0.781223  
H 3.975684 -3.944942 -0.953712

Cs3I2+.GG, iso III  
E= -513.573638

C -1.306361 1.082098 -2.272321  
H 0.586672 1.345007 -2.100413  
I 2.280728 2.357579 -0.565332  
I 0.482099 -2.327631 1.127329  
Cs -2.962719 -1.901573 -0.592403  
Cs 3.634826 -1.314976 -0.953319  
Cs 0.015421 1.324700 2.485128  
O -0.059715 0.717581 -2.509920

O -2.245525 0.336711 -2.471282  
C -1.503400 2.507035 -1.754359  
N -2.829613 2.671370 -1.222919  
C -3.205676 1.940926 -0.148978  
C -4.701800 1.833199 0.072581  
N -5.168384 0.618210 -0.604823  
H -1.342460 3.212500 -2.580233  
H -0.737176 2.725789 -1.000871  
H -3.546883 3.057121 -1.823617  
O -2.390421 1.341367 0.555596  
H -5.204943 2.757923 -0.260266  
H -4.870527 1.729082 1.150843  
H -6.161336 0.496068 -0.408364  
H -5.112532 0.769118 -1.612768

Cs3I2+.GG, iso IV

E=-513.572128  
C -3.871628 -0.602329 1.692908  
N -4.159821 0.774973 1.388426  
C -4.172499 -1.543421 0.548369  
O -3.450108 -2.470974 0.240587  
O -5.348583 -1.299308 -0.021801  
Cs -0.472323 -2.850963 0.265492  
I 2.228377 -0.971648 -1.875982  
Cs -0.700199 1.655758 -2.147658  
I -0.016407 0.909185 1.983581  
Cs 3.851242 0.733487 1.252320  
H -2.814284 -0.725541 1.962801  
H -4.491787 -0.912991 2.544582  
C -3.626972 1.337905 0.280860  
H -5.467294 -1.958893 -0.725435  
H -4.494477 1.371726 2.133032  
C -3.774366 2.846220 0.176927  
O -3.074392 0.661992 -0.586549  
N -2.478584 3.445375 -0.126192  
H -4.470446 3.047694 -0.650834  
H -4.246091 3.237201 1.094783  
H -2.595272 4.456279 -0.178481  
H -1.858069 3.283140 0.670444

Cs3I2+.GG, iso V

E=-513.571658  
C 3.881317 -0.322678 -3.084956  
N 4.420548 -1.558758 -2.574136  
C 3.457753 0.622915 -1.967394  
O 2.555149 1.427629 -2.096536  
O 4.201798 0.465992 -0.886405  
Cs 0.950689 -2.022222 1.009302  
I 2.614327 1.380162 2.056320  
Cs 0.317219 2.832852 -0.702767  
I -2.430405 -0.070160 -0.203652  
Cs -6.172143 -0.575083 -0.119211  
C 3.647143 -2.272373 -1.720953  
H 5.424569 -1.673987 -2.533396  
H 2.997157 -0.506255 -3.706153  
H 4.639224 0.174616 -3.704178  
H 3.820412 0.967852 -0.119942  
C 4.327153 -3.406317 -0.974019

O 2.460960 -2.000090 -1.552739  
N 4.038015 -3.280742 0.451913  
H 3.890799 -4.344861 -1.345201  
H 5.403095 -3.432947 -1.219655  
H 4.422244 -4.089592 0.937747  
H 4.554168 -2.480931 0.821530

Cs3I2+.GG, iso VI

E=-513.571533

C 4.071192 0.824011 -1.662100  
N 3.461670 -0.466177 -1.412935  
C 3.889349 -1.427307 -0.563135  
O 3.158031 -2.336910 -0.165485  
C 3.496967 1.876952 -0.715666  
O 2.875649 2.842042 -1.104012  
O 3.633800 1.624016 0.588913  
C 5.323501 -1.334574 -0.065400  
N 5.360634 -0.385649 1.057126  
Cs 0.578123 2.756446 0.936783  
I -0.190388 -0.045653 -2.126091  
Cs 0.362380 -2.952394 0.611737  
I -1.912867 -0.085310 2.221486  
Cs -3.977679 0.164536 -1.120758  
H 5.160776 0.769560 -1.548209  
H 3.850581 1.143593 -2.686239  
H 2.473937 -0.533785 -1.682006  
H 5.631522 -2.350977 0.214855  
H 5.998439 -0.981096 -0.853702  
H 6.323355 -0.139092 1.287929  
H 4.311643 0.894777 0.766594  
H 4.984937 -0.839232 1.891080

Cs3I2+.GG, iso VII

E=-513.564704

C -3.873248 1.573774 0.117090  
C -3.300793 0.159894 0.359788  
O -3.049509 -0.100638 1.561442  
N -3.229235 2.472343 1.057266  
C -2.607598 3.586546 0.682653  
O -2.655257 4.118395 -0.430205  
O -3.140894 -0.576496 -0.645445  
C -1.764997 4.283406 1.759772  
N -0.807188 5.111529 0.998344  
Cs -0.834193 0.178573 -2.327908  
I 1.414093 2.648257 0.120214  
Cs 3.995093 -0.261451 0.712596  
I 1.221939 -2.644224 -0.469515  
Cs -2.331692 -2.976226 1.148592  
H -2.979597 1.996349 1.925092  
H -3.686590 1.929694 -0.901122  
H -4.962024 1.557432 0.275425  
H -2.399061 4.930272 2.378573  
H -1.216235 3.578316 2.393441  
H 0.010382 4.511708 0.711503  
H -1.311895 5.351895 0.119369  
H -0.471135 5.942423 1.488886

Cs3I2+.GGG, iso I

E=-720.816465

C 2.537602 3.350288 0.381300  
C 3.456782 2.178959 0.084432  
O 3.464306 1.564657 -0.979174  
N 1.858947 3.818154 -0.814199  
N 4.277553 1.803115 1.099380  
C 5.079380 0.623977 0.921369  
C 4.214731 -0.611401 0.703670  
N 4.694273 -1.523822 -0.167255  
O 3.180406 -0.805660 1.341515  
I -1.185038 2.011679 1.305556  
Cs -4.488017 0.365501 0.004635  
I -1.690028 -2.100274 -1.141925  
Cs 0.803556 1.041556 -2.280940  
Cs 0.453895 -1.467418 2.274395  
H 1.074906 4.401176 -0.526608  
H 2.481470 4.422096 -1.348091  
H 1.773601 2.984859 1.084213  
H 3.119422 4.122690 0.916741  
H 4.228140 2.258411 2.000617  
H 5.772057 0.753687 0.077515  
H 5.678124 0.458670 1.827124  
C 3.927652 -2.719872 -0.402650  
H 5.411826 -1.250231 -0.825778  
C 2.555866 -2.395344 -0.973613  
H 4.458861 -3.355648 -1.122858  
H 3.808651 -3.291603 0.525444  
O 1.626046 -3.237166 -0.530188  
O 2.359490 -1.484979 -1.747987  
H 0.763053 -3.025308 -0.961546

Cs3I2+.GGG, iso II

E=-720.809601

C 2.007976 3.862566 -0.161211  
N 2.985973 3.484765 0.825799  
C 3.606884 2.287350 0.732958  
C 4.427852 1.886196 1.957925  
N 5.461446 0.947063 1.622616  
C 5.163915 -0.365371 1.446359  
O 4.068473 -0.844645 1.718639  
C 0.665495 3.161420 -0.015953  
O -0.116059 3.081439 -0.944658  
O 0.466936 2.713378 1.208714  
O 3.514999 1.562983 -0.254780  
C 6.294079 -1.233874 0.918833  
N 5.719516 -2.374120 0.216216  
Cs -2.519797 1.739816 -2.075012  
I -2.737413 1.392280 1.821284  
Cs -2.977721 -2.441793 1.679918  
I -0.959776 -1.911723 -1.654287  
Cs 2.826239 -1.277417 -1.086533  
H 2.968057 3.953800 1.723164  
H 2.391626 3.644011 -1.163358  
H 1.827550 4.944427 -0.101226  
H -0.445558 2.332209 1.303992  
H 4.867645 2.768239 2.441694  
H 3.740310 1.411060 2.672037  
H 6.324664 1.304233 1.233939

H 6.936733 -1.499159 1.778811  
H 6.917707 -0.654950 0.223124  
H 6.473998 -2.964343 -0.129772  
H 5.228069 -2.941292 0.907030

Cs3I2+.GGG, iso III

E=-720.801964

C 6.441766 -1.620183 -0.341911  
N 6.017133 -0.338421 0.154885  
C 4.760606 0.110521 -0.003317  
O 3.885948 -0.528346 -0.587422  
C 7.920467 -1.774648 -0.065564  
O 8.372249 -2.948518 -0.505629  
O 8.590947 -0.932894 0.485958  
C 4.466600 1.464679 0.634417  
N 3.737679 2.340317 -0.245577  
Cs 1.042293 -1.322731 -0.429232  
I -1.950154 -1.334802 2.181287  
Cs -1.145009 2.474827 1.514175  
I -1.888205 0.727730 -2.206293  
Cs -4.639515 -1.581688 -0.641770  
H 5.900553 -2.448343 0.140042  
H 6.264136 -1.714179 -1.423446  
H 9.321614 -2.990699 -0.300680  
H 6.732290 0.219736 0.612713  
H 3.841966 1.279901 1.518976  
H 5.387505 1.961655 0.967265  
C 2.383211 2.415202 -0.255618  
H 4.258598 2.890909 -0.916894  
C 1.826232 3.416486 -1.260103  
O 1.674551 1.737009 0.486495  
H 2.341435 4.373509 -1.089041  
H 2.136997 3.072490 -2.265119  
N 0.396768 3.604414 -1.105101  
H 0.119566 4.407028 -1.667685  
H -0.092832 2.815855 -1.537395

Cs3I2+.GGG, iso IV

E=-720.801928

C 3.566154 -0.822571 2.989382  
C 2.921868 -1.531772 1.807450  
O 3.623477 -1.411175 0.698704  
N 4.458144 0.246879 2.624326  
C 3.974311 1.302767 1.931258  
O 2.776994 1.447589 1.703326  
O 1.883063 -2.154168 1.932531  
C 5.024636 2.301868 1.445702  
N 4.427628 3.549161 1.058710  
Cs 1.104939 1.354266 -0.949145  
I -2.595969 0.125153 0.398992  
Cs -6.130179 1.400600 0.116972  
I 1.844625 -2.339587 -2.133301  
Cs -0.566658 -3.319749 0.694174  
H 5.457353 0.089638 2.652771  
H 2.748596 -0.446716 3.616779  
H 4.119907 -1.568803 3.574054  
H 3.149559 -1.840006 -0.065806  
H 5.782725 2.473472 2.221624

H 5.523312 1.865041 0.569238  
H 4.156479 4.189256 1.794124  
C 3.773070 3.629931 -0.130683  
C 2.972219 4.900351 -0.362442  
O 3.849859 2.761160 -0.990645  
H 3.691446 5.698713 -0.625042  
N 1.957246 4.637983 -1.372881  
H 2.485248 5.206441 0.574581  
H 1.456742 5.501580 -1.573359  
H 2.442425 4.396038 -2.236971

Cs3I2+.GGG, iso V

E=-720.801799

C 3.522744 0.954285 -1.491221  
C 4.155887 -0.323593 -0.979416  
O 5.083275 -0.305995 -0.174342  
N 3.650375 1.961631 -0.467599  
C 2.881088 3.067191 -0.458024  
O 1.999964 3.275911 -1.291921  
N 3.667722 -1.468824 -1.507845  
C 3.145586 4.056851 0.666251  
N 1.950600 4.862553 0.881474  
I -0.101680 -0.967310 -1.863674  
Cs -3.910950 -1.667356 -1.145454  
I -2.637639 0.456046 1.895963  
Cs -0.799949 3.081458 -0.422619  
Cs 0.774593 -1.510944 2.039588  
H 2.465014 0.802939 -1.739171  
H 4.038604 1.244518 -2.422303  
H 4.422355 1.839336 0.181811  
H 3.386891 3.508590 1.587540  
H 4.048797 4.636035 0.397482  
H 2.109010 5.484602 1.672141  
H 1.843017 5.475952 0.074341  
C 4.305596 -2.702781 -1.154678  
H 2.760913 -1.466454 -1.970788  
C 4.184874 -3.036403 0.319399  
H 3.851862 -3.525596 -1.723680  
H 5.374729 -2.676492 -1.401858  
O 5.150697 -3.871260 0.694126  
O 3.304996 -2.648300 1.061167  
H 5.012525 -4.083725 1.631537

Cs3I2+.GGG, iso VI

E=-720.800678

C -4.731131 0.659784 0.560753  
C -3.311004 0.429164 1.136766  
O -2.523849 1.423316 1.093540  
N -4.683631 1.598231 -0.540982  
C -3.818469 1.308012 -1.546409  
C -3.157638 2.525946 -2.166346  
N -2.374593 3.101275 -1.078921  
C -1.399284 3.978512 -1.311192  
O -1.067916 4.443823 -2.402110  
O -3.487033 0.158342 -1.822581  
O -3.058980 -0.706356 1.590300  
C -0.665819 4.473265 -0.059274  
N 0.633861 4.983500 -0.543834



Cs -0.205002 -0.063487 2.500290  
I 2.482044 2.274874 0.443680  
Cs 4.193192 -0.932937 -1.085505  
I 1.018338 -2.829805 -0.076462  
Cs -2.785715 -2.581317 -0.801729  
H -5.380392 1.065771 1.347272  
H -5.164381 -0.293189 0.237559  
H -4.785619 2.577632 -0.304424  
H -2.514811 2.213171 -2.997764  
H -3.895363 3.249889 -2.546809  
H -2.421618 2.598723 -0.163110  
H -1.236880 5.288095 0.401629  
H -0.493390 3.678170 0.673818  
H 0.961100 5.825145 -0.064952  
H 1.362916 4.233416 -0.417737  
H 0.484903 5.168128 -1.558983

Cs2I+.GG, iso I

E=-502.100415  
C -4.170797 2.037708 0.648915  
C -2.811168 2.226847 -0.006758  
N -2.046957 3.214211 0.520712  
C -0.693939 3.385534 0.066274  
C 0.236392 2.220897 0.373119  
O 1.360181 2.167846 -0.091357  
N -4.851039 0.880997 0.083310  
O -2.438500 1.547239 -0.958534  
O -0.298522 1.320205 1.179036  
Cs -2.612658 -1.477376 -0.501391  
I 1.070322 -1.820522 0.644848  
Cs 3.881168 0.561012 -0.406736  
H -5.752225 0.777854 0.547225  
H -5.075974 1.094805 -0.888362  
H -4.724653 2.989339 0.553075  
H -4.013690 1.874260 1.725686  
H -2.333218 3.651452 1.387094  
H -0.669048 3.519857 -1.023014  
H -0.267757 4.291572 0.515394  
H 0.279209 0.513846 1.202281

Cs2I+.GG, iso II

E=-502.099793  
H -0.231124 1.680213 -0.053743  
I 1.683662 -0.289621 0.011436  
Cs 5.355368 0.490371 0.036277  
O -0.978667 2.189669 -0.434770  
C -2.114506 1.786572 0.124889  
O -2.198541 0.980485 1.026583  
Cs -1.891938 -1.861120 -0.030578  
C -3.300625 2.447555 -0.556882  
H -3.171702 2.298774 -1.639137  
H -3.254717 3.528524 -0.373533  
N -4.558198 1.931759 -0.108652  
H -5.234540 2.492796 0.403974  
C -4.903299 0.646871 -0.296670  
O -4.190479 -0.184962 -0.862672  
C -6.261020 0.277857 0.286793  
H -6.051130 -0.290528 1.204832

H -6.727820 -0.427322 -0.420406  
N -7.056999 1.446072 0.620240  
H -7.618342 1.737101 -0.176943  
H -7.708728 1.242116 1.372427

Cs2I+.GG, iso III

E=-502.095797  
Cs -1.636364 0.406086 -0.003889  
I 2.140008 0.064486 -0.024912  
Cs 5.852641 -0.189995 0.016637  
N -3.904804 2.861753 -0.117540  
H -3.842182 3.023684 0.887453  
H -3.897000 3.787393 -0.541818  
C -5.188264 2.227452 -0.382839  
H -6.064808 2.772775 0.014206  
H -5.334784 2.141978 -1.468955  
C -5.193827 0.845254 0.245896  
O -4.491715 0.575912 1.215101  
N -6.037262 -0.059211 -0.310609  
H -6.505243 0.159693 -1.179916  
C -6.056363 -1.408658 0.175393  
H -6.150140 -1.420406 1.270314  
H -6.920503 -1.947653 -0.231622  
C -4.789836 -2.170554 -0.173692  
O -3.809837 -1.694262 -0.704039  
O -4.894904 -3.444815 0.202466  
H -4.065230 -3.893673 -0.030232

Cs2I+.GG, iso IV

E=-502.094126  
I 0.103885 -1.582818 0.867126  
Cs -3.478096 -0.743432 -0.366439  
Cs 3.466052 -0.726925 -0.727433  
C -1.545112 2.163478 -0.882368  
O -1.814538 1.872353 0.389314  
O -2.253419 1.748983 -1.776070  
C -0.346578 3.064318 -1.188620  
H 0.309783 2.527735 -1.882695  
H -0.724715 3.949609 -1.716724  
N 0.404978 3.428471 -0.017113  
H -0.099739 3.969534 0.675709  
C 1.378919 2.603523 0.471276  
O 2.069577 1.880717 -0.236956  
C 1.390076 2.550202 1.989143  
H 1.426326 3.568085 2.403138  
H 2.284510 2.008404 2.327208  
N 0.120502 1.914852 2.358922  
H 0.204085 0.897009 2.251229  
H -0.105698 2.086512 3.337586  
H -1.093206 2.043284 1.070276

Cs2I+.GG, iso V

E=-502.092955  
I -0.071677 -1.889596 0.013713  
Cs -3.552527 -0.271288 -0.639770  
Cs 3.526125 -0.831821 0.033099  
N -2.225589 0.292505 2.262399  
H -2.575132 0.028597 3.181444

H -1.611075 -0.471548 1.969639  
C -1.419292 1.490687 2.399530  
H -2.003252 2.263791 2.923410  
H -0.492553 1.348531 2.985084  
C -1.058702 2.091200 1.047412  
O -1.786958 2.023367 0.065532  
N 0.116939 2.782122 1.044243  
H 0.700383 2.760218 1.869580  
C 0.567562 3.505759 -0.104647  
H -0.224180 3.459391 -0.863344  
H 0.737510 4.571154 0.114945  
C 1.836849 2.958114 -0.718929  
O 2.490118 2.023330 -0.301896  
O 2.163037 3.671447 -1.797350  
H 2.991711 3.317318 -2.157642

Cs2I+.GG, iso VI  
E=-502.090942

I -1.401431 -2.064749 -0.109534  
Cs 2.459086 -1.781092 -0.078534  
Cs -3.345484 1.207580 -0.332233  
O 0.426097 0.048462 1.907271  
H -0.308280 -0.479726 1.493158  
C 0.314735 1.317825 1.545876  
O -0.599694 1.780683 0.891274  
C 1.463061 2.164458 2.072529  
H 2.235561 1.509349 2.494087  
H 1.074406 2.800400 2.877988  
N 2.001764 3.002670 1.032408  
H 1.950089 4.009666 1.112174  
C 2.566201 2.433506 -0.057300  
O 2.616392 1.207164 -0.179363  
C 3.117004 3.395870 -1.104193  
H 3.847210 4.055091 -0.609691  
H 2.290221 4.050315 -1.423048  
N 3.721865 2.784151 -2.256830  
H 3.057857 2.155905 -2.702168  
H 4.506919 2.205717 -1.969042

Cs2I+.GGG, iso I  
E=-709.332190

C 4.804826 0.064826 1.752782  
N 5.185623 0.596892 0.456193  
C 4.765995 -0.030097 -0.681272  
O 4.492543 -1.219949 -0.743802  
C 3.345094 0.430888 1.983589  
O 3.177372 1.743614 1.900915  
O 2.457109 -0.387244 2.124718  
C 4.644007 0.915407 -1.884342  
N 3.828367 2.061036 -1.522686  
C 2.588549 1.827541 -1.023633  
O 2.153995 0.683610 -0.933106  
C 1.757081 3.004381 -0.550847  
N 1.009370 2.574342 0.627606  
Cs 1.455228 -2.057387 -0.159961  
I -1.952352 -0.024328 -0.150190  
Cs -5.681443 0.254034 0.072882  
H 4.922119 -1.022148 1.750747

H 5.443998 0.499457 2.531795  
H 5.175961 1.610005 0.415967  
H 5.635121 1.270275 -2.195271  
H 4.196326 0.339638 -2.704261  
H 4.169763 3.005183 -1.648518  
H 2.403263 3.852796 -0.286594  
H 1.114588 3.319494 -1.392022  
H 2.219377 1.988338 1.650994  
H 0.418459 3.332913 0.964268  
H 0.372508 1.814008 0.367082

Cs2I+.GGG, iso II  
E=-709.332057

C 0.087666 3.254741 -0.332740  
C -0.844150 2.140697 0.115871  
O -0.232938 1.184051 0.790106  
N 1.373190 3.305649 0.307926  
C 2.388518 2.487939 -0.063503  
C 3.686523 2.700919 0.723049  
N 4.757165 1.895586 0.210879  
C 4.732793 0.557165 0.440187  
C 5.762896 -0.268731 -0.309808  
N 5.302614 -1.649043 -0.382542  
O 2.290478 1.660533 -0.961567  
O -2.025479 2.147634 -0.180218  
O 3.950885 0.042173 1.232337  
Cs -4.626508 0.617940 -0.244706  
Cs 1.945120 -1.484429 -0.446587  
I -1.818789 -1.859537 0.486187  
H -0.437222 4.208208 -0.200328  
H 0.231594 3.109194 -1.413208  
H 1.492154 3.904270 1.115146  
H 3.972164 3.761034 0.688742  
H 3.506239 2.431069 1.772666  
H 5.267337 2.237112 -0.593554  
H 5.882277 0.128939 -1.327679  
H 6.733717 -0.131517 0.201549  
H 5.992432 -2.200710 -0.889559  
H 5.302378 -2.023956 0.566078  
H -0.850722 0.411827 0.895914

Cs2I+.GGG, iso III  
E=-709.330304

C -2.652394 2.535692 -1.171525  
C -1.529437 1.892605 -0.376776  
O -0.339497 2.250408 -0.827613  
N -3.895638 1.832552 -1.005474  
C -3.989185 0.568805 -1.501294  
C -5.317004 -0.135083 -1.220184  
N -5.772034 0.123006 0.124342  
C -4.960458 -0.246359 1.152168  
C -5.135877 0.565616 2.418348  
N -4.581770 1.887433 2.120434  
O -3.098219 0.044588 -2.162549  
O -1.725313 1.137974 0.557963  
O -4.064452 -1.073070 1.003687  
Cs -1.422631 -1.810111 -0.174765  
I 2.178386 -0.208185 0.088066

Cs 5.889871 0.342864 0.139962  
H -2.359800 2.550519 -2.228072  
H -2.770956 3.577019 -0.842838  
H -4.461909 2.074260 -0.193356  
H -6.071769 0.216642 -1.935455  
H -5.166410 -1.208043 -1.381743  
H -6.425526 0.879652 0.284927  
H -6.203338 0.668053 2.660811  
H -4.644906 0.025600 3.242447  
H -4.764381 2.528568 2.889869  
H -3.567071 1.802649 2.042680  
H 0.355509 1.749704 -0.344055

Cs2I+.GGG, iso IV  
E=-709.325875

C 1.306048 1.540108 -1.747781  
N 0.658635 2.311860 -0.714691  
C 1.090321 2.206317 0.559749  
O 2.098320 1.569253 0.866768  
C 2.801719 1.779356 -1.777003  
O 3.631130 0.896080 -1.826309  
O 3.099076 3.079375 -1.792664  
C 0.247033 2.936807 1.593947  
N -0.585495 2.015932 2.332150  
C -1.734140 1.527459 1.804927  
O -2.129463 1.846322 0.683652  
C -2.523517 0.638495 2.755158  
N -3.164089 -0.465098 2.060522  
Cs 3.435124 -1.150805 0.422746  
H 1.125843 0.464808 -1.615677  
H 0.903871 1.849347 -2.721661  
H -0.281341 2.658726 -0.863043  
H 0.930603 3.436079 2.290499  
H -0.389036 3.695826 1.121385  
H -0.237025 1.631340 3.199907  
H -1.862845 0.323629 3.582251  
H -3.295806 1.284661 3.201031  
H -2.434204 -1.122377 1.772209  
H -3.743136 -0.972701 2.727219  
H 4.067650 3.149033 -1.831625  
I -0.329542 -1.827054 -0.108514  
Cs -3.733296 -0.112883 -1.030795

Cs2I+.GGG, iso V  
E=-709.325376

C 2.462654 -3.348401 0.052006  
N 3.815020 -2.869752 0.128216  
C 4.158967 -1.759068 -0.575088  
O 3.409802 -1.262193 -1.409091  
C 1.471947 -2.279274 0.495365  
O 1.792990 -1.241694 1.038369  
O 0.234804 -2.635695 0.186536  
C 5.465639 -1.103994 -0.149952  
N 5.192822 -0.233874 0.979876  
C 4.673284 1.008726 0.779863  
O 4.618814 1.540573 -0.322188  
C 4.177758 1.720560 2.028501  
N 3.222907 2.746243 1.636657

Cs 1.603403 1.244096 -0.923821  
H 2.201434 -3.639787 -0.973859  
H 2.343255 -4.236131 0.686068  
H 4.431202 -3.225039 0.846203  
H 6.229011 -1.842753 0.129114  
H 5.838534 -0.493790 -0.978176  
H 5.016804 -0.670812 1.876304  
H 3.677854 0.993819 2.684522  
H 5.064791 2.093997 2.574053  
H 2.889010 3.227826 2.468982  
H 3.722077 3.447577 1.090521  
H -0.386390 -1.902595 0.397505  
I -2.075818 0.132537 -0.035212  
Cs -5.813171 -0.060720 0.198705

Cs2I+.GGG, iso VI  
E=-709.324567

C 0.169414 2.630992 2.263586  
N 1.027038 3.233267 1.264948  
C 1.673078 2.449523 0.371890  
O 1.411346 1.257860 0.247600  
C -0.808334 1.649102 1.632578  
O -1.584201 1.962227 0.749542  
O -0.733862 0.461349 2.206261  
C 2.767672 3.130780 -0.450744  
N 3.296990 2.254728 -1.455760  
C 4.017708 1.164635 -1.071262  
O 4.378703 0.985685 0.084713  
C 4.400624 0.201262 -2.181748  
N 4.597801 -1.123213 -1.607084  
H 0.753122 2.109254 3.034064  
H -0.416779 3.424597 2.743382  
H 1.307258 4.198785 1.382116  
H 2.383364 4.046494 -0.920127  
H 3.572833 3.418438 0.240480  
H 2.864368 2.252203 -2.369923  
H 3.602855 0.159910 -2.937252  
H 5.292415 0.621251 -2.682981  
H 4.952808 -1.748096 -2.328879  
H 5.350558 -1.042871 -0.922723  
H -1.267889 -0.197460 1.693741  
Cs 2.116269 -1.643208 0.514698  
I -1.752187 -2.098495 0.073920  
Cs -3.917700 0.892836 -0.841154

Cs2I+.GGG-HI  
E=-697.493250

C 2.460472 -1.528688 -0.913629  
O 3.262947 -0.614928 -0.740038  
N 1.529759 -1.559293 -1.894915  
C 0.997710 -0.319946 -2.437034  
H 1.779569 0.444460 -2.410033  
H 0.699218 -0.469304 -3.483686  
C -0.240139 0.046080 -1.589980  
O -1.034144 -0.914808 -1.411327  
O -0.333732 1.213331 -1.126659  
H 0.788568 -2.243275 -1.768380  
N -1.755034 -1.322433 2.119537

H -1.025741 -0.738086 2.531058  
H -2.285534 -1.685259 2.908877  
C -1.067611 -2.432955 1.465231  
H -1.570619 -2.715535 0.529376  
N 1.066906 -3.007622 0.451279  
O 0.838115 -0.954518 1.375679  
H -1.011656 -3.335790 2.097140  
H 0.646452 -3.912519 0.282419  
C 2.423547 -2.743907 0.014980  
H 3.083924 -2.522173 0.863039  
H 2.803787 -3.633130 -0.503857  
Cs 2.084329 1.748712 0.569423  
Cs -3.197941 0.549360 -0.139785  
C 0.356654 -2.052333 1.095665

#### Cs2I.GG-HI

E=-490.257103

C 0.836472 -1.118264 -1.553063  
C -0.301964 -0.589062 -0.648068  
O -0.620344 0.630255 -0.780241  
O -0.836203 -1.434080 0.099677  
H 1.447474 -0.288977 -1.932295  
H 0.380571 -1.609572 -2.423258  
N 1.677356 -2.072078 -0.878595  
H 1.500066 -3.072090 -0.919374  
C 2.464449 -1.676379 0.129335  
O 2.647175 -0.489629 0.429088  
C 3.117519 -2.800950 0.915582  
H 2.589631 -2.829879 1.879847  
H 4.150356 -2.481727 1.134377  
N 2.984908 -4.089738 0.259464  
H 3.745811 -4.234888 -0.400195  
H 3.041317 -4.846764 0.934619  
Cs 1.716190 2.212078 0.092240  
Cs -3.456462 -0.212948 0.180656

#### Cs3I2.GGG-HI

E=-708.979176

O -0.851325 1.874249 1.501554  
C -0.241762 0.994091 2.159518  
O -0.467406 -0.244677 2.168327  
C 0.889092 1.489922 3.089535  
N 2.113056 0.723024 2.942324  
C 2.873998 0.888052 1.848674  
C 4.146957 0.040088 1.756338  
N 4.554671 -0.073984 0.379264  
O 2.605278 1.697174 0.962418  
C 3.709122 -0.684159 -0.482833  
O 2.763067 -1.366167 -0.087102  
C 3.967294 -0.503440 -1.963061  
N 2.733037 -0.020363 -2.577218  
H 2.006060 -0.722577 -2.428289  
H 2.857469 0.010647 -3.588308  
H 4.320345 -1.475789 -2.352529  
H 4.771356 0.225051 -2.132715  
H 5.173055 0.636908 0.010671  
H 4.949256 0.523791 2.329343  
H 1.100725 2.544364 2.881192

H 3.982703 -0.958178 2.182372  
H 2.325434 -0.019046 3.595225  
H 0.553634 1.396750 4.130632  
Cs 0.677153 2.255983 -1.164746  
Cs 0.282312 -2.673017 0.713220  
I -1.605676 -0.836940 -2.148571  
Cs -3.454187 0.576365 0.982898

#### Cs3I2.GG-HI

E=-501.747507

C -0.431033 -0.860063 1.966600  
O 0.530104 -1.615867 1.675424  
O -0.471038 0.393028 1.905177  
C -1.691292 -1.583785 2.500528  
N -2.923605 -0.911392 2.160453  
C -3.266390 -0.748694 0.874571  
O -2.592140 -1.197290 -0.060560  
C -4.556245 0.003310 0.601734  
N -4.354329 0.866449 -0.558126  
H -5.244017 1.291798 -0.814310  
H -4.113860 0.257688 -1.341290  
H -4.839010 0.613970 1.470387  
H -5.351328 -0.753087 0.468352  
H -3.464018 -0.449376 2.879101  
H -1.620343 -1.641053 3.594236  
H -1.704811 -2.611980 2.116681  
Cs -0.112153 -2.587241 -1.126586  
Cs -1.429629 2.272126 -0.193931  
I 1.673513 0.787372 -1.984302  
Cs 2.787620 0.321885 1.716111

#### Cs3I2.G-HI

E=-294.507856

C -0.781709 -1.388212 2.770526  
N -2.221785 -1.617971 2.688622  
C -0.357377 -0.090683 2.056212  
O -1.279604 0.687119 1.700140  
O 0.882511 0.076756 1.909489  
Cs 2.760678 -1.573744 0.378883  
I 0.361357 -0.021244 -2.251444  
Cs 0.426691 2.822597 0.508554  
Cs -2.965626 -0.850522 -0.338897  
H -2.477380 -2.368169 3.329116  
H -2.664019 -0.778564 3.063373  
H -0.248195 -2.230703 2.303679  
H -0.394390 -1.316717 3.802825

#### Cs2I+

E=-11.483636

I 0.000000 0.000000 0.000000  
Cs 0.000000 0.000000 3.742012  
Cs 0.000000 0.000000 -3.742012

#### Cs3I2+

E=-22.956584

Cs 0.000000 0.000033 0.000054  
I -0.000011 0.003662 -3.780838  
Cs -0.000022 0.007218 -7.494656

I 0.000011 -0.003648 3.780842  
Cs 0.000022 -0.007264 7.494597

H -2.847119 -2.115450 0.166360  
H -1.787597 1.207620 -0.555825  
H -3.899572 0.044762 0.140640  
H -2.650601 0.148947 1.208242

G

E=-283.354905  
C -0.640357 -0.783884 -0.137125  
N -1.761030 0.117872 0.097684  
C 0.689355 -0.035557 -0.004036  
O 1.749202 -0.598512 0.107089  
O 0.545648 1.290188 -0.068575  
H -2.577491 -0.143061 -0.447416  
H -2.041670 0.103689 1.075573  
H -0.679856 -1.155140 -1.170678  
H -0.598338 -1.666320 0.517890  
H -0.428227 1.418962 -0.120309

GG

E=-490.574634  
N 3.574392 0.317640 -0.497960  
H 4.423106 0.767173 -0.165904  
H 3.686604 -0.681398 -0.329870  
C 2.436372 0.758557 0.280982  
H 2.619088 0.850000 1.371116  
H 2.092911 1.745418 -0.064681  
C 1.321720 -0.263003 0.134755  
O 1.551278 -1.464888 0.092907  
N 0.061286 0.237681 0.112220  
H -0.117175 1.234150 0.072463  
C -1.070805 -0.637782 0.025412  
H -1.133658 -1.317047 0.889757  
H -1.021156 -1.287468 -0.862765  
C -2.334164 0.180831 -0.043239  
O -2.372993 1.389981 -0.050954  
O -3.419830 -0.602785 -0.098344  
H -4.185840 -0.008155 -0.146276

GGG

-697.802252  
C 1.366488 1.754197 -0.470789  
N 1.533377 0.368501 -0.862607  
C 1.971162 -0.554068 0.053535  
O 2.754360 -0.321935 0.953639  
C -0.090060 1.997802 -0.098036  
O -0.903015 1.391754 -0.984890  
O -0.468591 2.624573 0.861453  
C 1.404089 -1.963095 -0.179423  
N 0.010447 -1.922936 -0.575054  
C -0.882538 -1.293388 0.235216  
O -0.550798 -0.794632 1.301823  
C -2.327689 -1.227100 -0.237288  
N -2.885391 0.039560 0.219605  
H 1.999084 1.958406 0.398946  
H 1.656635 2.433999 -1.286327  
H 0.771255 0.045225 -1.446959  
H 1.977883 -2.472027 -0.965256  
H 1.541495 -2.503560 0.765985  
H -0.294608 -2.345915 -1.440930  
H -2.380252 -1.282061 -1.333969
